# Supplementary material for: Generating variability from motor primitives during infant locomotor development
Source: eLife. 2023 Jul 31;12:e87463. doi: 10.7554/eLife.87463 (PMC10390046; doi:10.7554/eLife.87463)
Supplement: Figure 2—source data 1. [file elife-87463-fig2-data1.xlsx]

## Sheet: Nouveau
Figure 2 - Source Data 1
Individual data regarding basic EMG and kinematic parameters (Figure 2F, 2G, 2H)
Subject ID	Cycle duration (s)
	Stepping		Walking	Kicking
	Birth	3 months		3 months	Birth
11	/	/	0.9328	0.974	1.5272
8	2.6444	1.3272	0.6432	1.662	4.244
4	/	2.5868	0.756	0.6064	3.5464
16	2.306	2.0188	0.7488	1.6452	2.936
3	3.0732	3.37	0.7096	5.68	/
7	/	1.8012	0.6784	4.3232	/
15	5.386	3.2152	0.8992	/	3.9072
17	1.8308	2.6328	/	3.0184	3.882
6	4.8496	1.95	0.8952	/	2.4088
14	/	2.94	0.684	2.4972	1.36
12	/	1.7812	0.8448	0.5612	5.86
2	3.724	2.5588	0.8168	2.614	/
10	2.0428	/	0.946	/	1.894
13	2.788	1.988	0.7048	0.9292	1.1904
18	4.1924	2.7632	/	2.8868	4.406
1	2.07	1.484	0.8224	2.5068	4.8144
9	4.5152	2.7808	1.1076	2.2368	8.5092
5	/	/	/	0.7384	2.9032
Mean	3.2852	2.34653	0.81264	2.19197	3.55925
SD	1.21305	0.626463	0.127472	1.44397	1.93234
Subject ID	Variability of cycle duration (a.u.)
	Stepping		Walking	Kicking
	Birth	3 months		3 months	Birth
11	/	/	0.220975	0.543673	0.943982
8	0.734745	0.613803	0.118717	0.968489	2.04484
4	/	0.989206	0.0817313	0.181862	1.55324
16	0.825701	0.388644	0.138131	0.968033	1.35406
3	1.64958	1.09247	0.156441	2.21663	/
7	/	0.86973	0.113786	4.15365	/
15	1.97834	1.02104	0.107259	/	2.69249
17	0.611464	1.65291	/	1.61006	4.54002
6	0.938078	0.463195	0.143422	/	0.738525
14	/	0.979372	0.0554977	1.94891	0.386838
12	/	0.363969	0.0882685	0.291865	0.887665
2	2.71437	1.0673	0.0979559	1.36203	/
10	1.28316	/	0.158958	/	0.844071
13	1.64272	0.785856	0.0773257	0.560329	0.398408
18	2.32645	1.09594	/	2.31053	2.83961
1	0.498221	0.527475	0.0931417	1.33397	2.82137
9	1.44986	1.6894	0.303516	0.76541	3.25156
5	/	/	/	0.301627	1.54941
Mean	1.38772	0.906687	0.130342	1.30114	1.78974
SD	0.705604	0.404962	0.0631639	1.04933	1.20958
Subject ID	Proportion of extension phase (%)
	Stepping		Walking	Kicking
	Birth	3 months		3 months	Birth
11	/	/	75.7309	44.7583	55.4599
8	72.429	71.626	69.3658	55.7824	66.8068
4	/	86.3095	69.9221	47.0864	67.3221
16	69.5059	66.0174	70.7182	59.0094	54.2312
3	55.7608	61.9023	71.6762	88.9443	/
7	/	58.7121	68.347	59.8864	/
15	70.6697	77.4888	74.0974	/	75.792
17	77.0899	61.5062	/	61.969	71.0702
6	72.8007	73.1078	70.4768	/	61.4695
14	/	70.8344	68.5032	77.5567	45.814
12	/	73.4167	72.7062	45.3324	80.6535
2	62.6279	56.7558	72.2184	51.8392	/
10	67.4616	/	72.7078	/	39.0715
13	45.7095	52.5414	68.4752	46.207	45.5429
18	80.1299	58.8822	/	78.1297	60.1746
1	63.1057	64.0833	70.3258	53.6851	64.4893
9	56.4928	52.7676	73.8424	73.924	63.2217
5	/	/	/	55.5012	65.3308
Mean	66.1486	65.7301	71.2742	59.9741	61.0967
SD	9.8759	9.59929	2.25171	13.6863	11.4757
