# Supplementary material for: Generating variability from motor primitives during infant locomotor development
Source: eLife. 2023 Jul 31;12:e87463. doi: 10.7554/eLife.87463 (PMC10390046; doi:10.7554/eLife.87463)
Supplement: Figure 3—source data 1. [file elife-87463-fig3-data1.xlsx]

## Sheet: Nouveau
Figure 3 - Source Data 1
Individual data regarding EMG output and modeling of the modular organization from birth to walking onset (Figure 3B, 3C, 3D)
Subject ID	Index of Recruitment Variability
	Stepping		Walking	Kicking
	Birth	3 months		3 months	Birth
11	/	/	6.68962	22.2958	55.1579
8	20.1662	19.7473	9.02482	25.6718	23.1988
4	/	14.2867	8.37758	31.3675	20.1548
16	34.6591	26.6729	7.37591	17.899	29.0865
3	53.8976	15.5872	6.79153	16.0235	/
7	/	18.7493	9.54845	19.4434	/
15	22.0115	12.9568	5.53542	/	35.8026
17	24.7125	18.5217	/	29.5569	31.0995
6	12.0708	16.2093	7.00154	/	19.3632
14	/	13.7599	6.69191	14.6981	18.2867
12	/	15.854	4.51707	34.0072	14.1626
2	43.0978	15.3129	7.32957	19.148	/
10	49.5064	/	6.21838	/	20.7068
13	33.4857	20.0907	6.82463	21.1516	31.5956
18	20.3267	19.849	/	29.5504	37.2516
1	34.2023	30.163	5.59141	12.9951	17.6213
9	24.6482	14.2941	5.14568	30.628	15.2864
5	/	/	/	21.3615	21.7912
Mean	31.0654	18.137	6.84424	23.0532	26.0377
SD	12.7678	4.82806	1.3884	6.65557	10.8762
Subject ID	Number of modules to reach VAF>75%
	Stepping		Walking	Kicking
	Birth	3 months		3 months	Birth
11	/	/	7.8	5	3.4
8	4	5	6.2	4	5
4	/	6.2	6	3.6	5
16	4.2	5.4	7	4.6	4
3	3	5	6.8	5	/
7	/	4.8	6.8	5	/
15	5	5.8	7.6	/	4
17	4.2	5.4	/	4.2	4
6	5.6	5	7	/	5
14	/	5.4	7	5.8	5.4
12	/	4.6	7.8	4	5
2	4	5.8	6.2	5	/
10	3.4	/	7.2	/	4.8
13	4	5	6.6	5	4.2
18	5.2	4.6	/	4.2	4
1	4	4	7.4	4.6	4.4
9	4.8	5.4	8	3.8	5.2
5	/	/	/	4.6	5
Mean	4.28333	5.16	7.02667	4.56	4.56
SD	0.745695	0.55652	0.618139	0.591366	0.591366
Subject ID	Index of EMG Variability (a.u.)
	Stepping		Walking	Kicking
	Birth	3 months		3 months	Birth
11	/	/	0.114725	0.151104	0.147626
8	0.124562	0.149953	0.127106	0.13847	0.146626
4	/	0.145039	0.114182	0.149142	0.175511
16	0.173539	0.13492	0.128295	0.140986	0.150322
3	0.163188	0.127771	0.122596	0.117239	/
7	/	0.151034	0.130082	0.166916	/
15	0.164577	0.121967	0.126633	/	0.163578
17	0.164246	0.142911	/	0.143696	0.17977
6	0.134337	0.132508	0.128349	/	0.149297
14	/	0.142914	0.111195	0.157015	0.153026
12	/	0.134704	0.110143	0.16883	0.0980075
2	0.168986	0.143363	0.11481	0.145737	/
10	0.151037	/	0.114555	/	0.168611
13	0.19034	0.158184	0.116037	0.154942	0.168563
18	0.15475	0.141819	/	0.149091	0.150791
1	0.16019	0.109826	0.0972074	0.115855	0.13628
9	0.173485	0.112557	0.11049	0.166132	0.130527
5	/	/	/	0.145005	0.145499
Mean	0.16027	0.136631	0.11776	0.147344	0.150936
SD	0.0176764	0.0138528	0.00919916	0.0156015	0.0202089
