# Supplementary material for: Generating variability from motor primitives during infant locomotor development
Source: eLife. 2023 Jul 31;12:e87463. doi: 10.7554/eLife.87463 (PMC10390046; doi:10.7554/eLife.87463)
Supplement: Figure 5—source data 1. [file elife-87463-fig5-data1.xlsx]

## Sheet: Nouveau
Figure 5 - Source Data 1
Individual data regarding modules' structure from birth to walking onset (Figure 5B, 5C)
Subject ID	SMAI
	Stepping		Walking	Kicking
	Birth	3 months		3 months	Birth
11	/	/	0.821609	0.696866	0.629936
8	0.761594	0.717946	0.784965	0.730231	0.670603
4	/	0.761144	0.812808	0.690849	0.739026
16	0.653367	0.726102	0.800297	0.744722	0.685278
3	0.616276	0.757708	0.844643	0.738186	/
7	/	0.743585	0.782837	0.747318	/
15	0.724655	0.741637	0.911007	/	0.651385
17	0.639591	0.702255	/	0.706831	0.716729
6	0.760158	0.712869	0.870882	/	0.721987
14	/	0.748807	0.826951	0.730121	0.739261
12	/	0.732154	0.889814	0.67107	0.730325
2	0.644776	0.710342	0.803865	0.711902	/
10	0.69369	/	0.842432	/	0.732963
13	0.769747	0.708923	0.7758	0.738509	0.651626
18	0.746786	0.699886	/	0.719865	0.71185
1	0.641788	0.668172	0.772937	0.698108	0.719851
9	0.648122	0.675973	0.858672	0.741837	0.680314
5	/	/	/	0.704852	0.6906
Mean	0.691712	0.7205	0.826635	0.718085	0.698116
SD	0.0574086	0.0277299	0.0424425	0.0229696	0.0353395
Subject ID	STAI
	Stepping		Walking	Kicking
	Birth	3 months		3 months	Birth
11	/	/	0.484301	0.392652	0.370914
8	0.423861	0.397876	0.488298	0.442833	0.399505
4	/	0.400393	0.469354	0.382081	0.396807
16	0.413608	0.391512	0.483864	0.395213	0.409012
3	0.37624	0.392827	0.486149	0.440518	/
7	/	0.417887	0.494308	0.431517	/
15	0.389949	0.383269	0.47315	/	0.351592
17	0.402716	0.389589	/	0.370593	0.431867
6	0.426564	0.44625	0.459737	/	0.424533
14	/	0.444566	0.452779	0.404118	0.451061
12	/	0.458929	0.524082	0.392182	0.396813
2	0.394081	0.383633	0.447359	0.406176	/
10	0.380392	/	0.502048	/	0.418566
13	0.435392	0.455	0.50883	0.419185	0.395976
18	0.386373	0.395766	/	0.363466	0.374433
1	0.410227	0.356263	0.461244	0.414298	0.417911
9	0.367756	0.381499	0.479676	0.383758	0.358342
5	/	/	/	0.429086	0.376566
Mean	0.400597	0.406351	0.481012	0.404512	0.39826
SD	0.0215972	0.0309323	0.0212454	0.0247276	0.0281452
